# Supplementary material for: Corynebacterium glutamicum regulation beyond transcription: Organizing principles and reconstruction of an extended regulatory network incorporating regulations mediated by small RNA and protein-protein interactions
Source: bioRxiv or medRxiv preprint supplement (doi:10.1101/2021.01.07.423633), 2021-01-08
Supplement: Supplementary file [file media-1.pdf]

**Supplementary material for**

***Corynebacterium glutamicum* regulation beyond transcription: Organizing principles and reconstruction of an extended regulatory network incorporating regulations mediated by small RNA and protein-protein interactions**

**Juan M. Escorcía-Rodríguez<sup>1</sup>, Andreas Tauch<sup>2</sup>, and Julio A. Freyre-González<sup>1,\*</sup>**

<sup>1</sup> Regulatory Systems Biology Research Group, Laboratory of Systems and Synthetic Biology, Center for Genomic Sciences, Universidad Nacional Autónoma de México. Av. Universidad s/n, Col. Chamilpa, 62210. Cuernavaca, Morelos, México

<sup>2</sup> Centrum für Biotechnologie (CeBiTec). Universität Bielefeld, Universitätsstraße 27, 33615. Bielefeld, Germany

\* Correspondence: jfreyre@ccg.unam.mx (J.A.F.G.)

## Supplementary figures

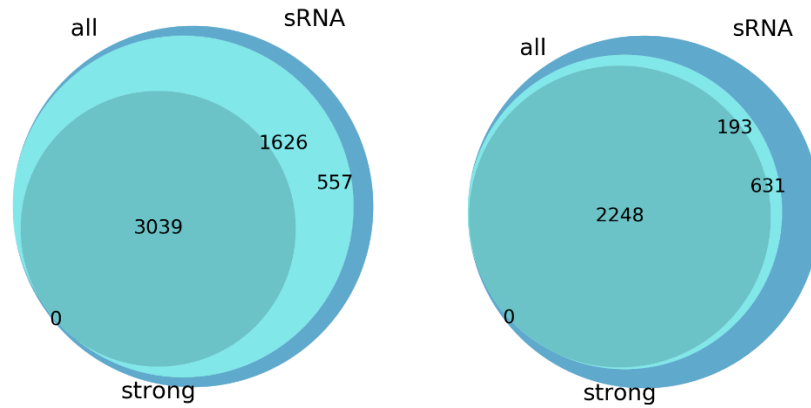

**Supplementary figure 1.** The overlap between the tree network models of *C. glutamicum* for nodes (left) and interactions (right).

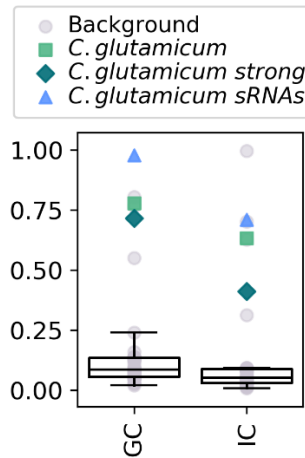

**Supplementary figure 2.** Distribution of the genomic coverage (GC) and interactions coverage (IC) for the non-redundant set of regulatory networks from Abasy Atlas. The data points for the three *C. glutamicum* networks reported in this work are highlighted. Please note that the GC for the sRNA network is inflated by the sRNA nodes (545/3072) although there are still 86 protein-coding genes more than in the *all evidence* network.

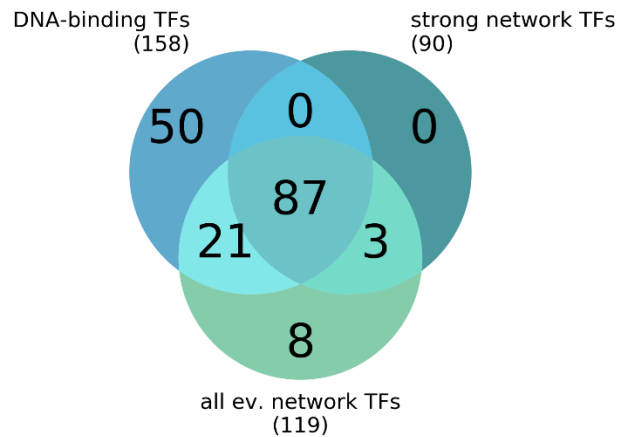

**Supplementary figure 3.** Overlap of transcription factors between the two transcriptional regulatory networks and the complete set of DNA-binding transcription factors in *C. glutamicum*.

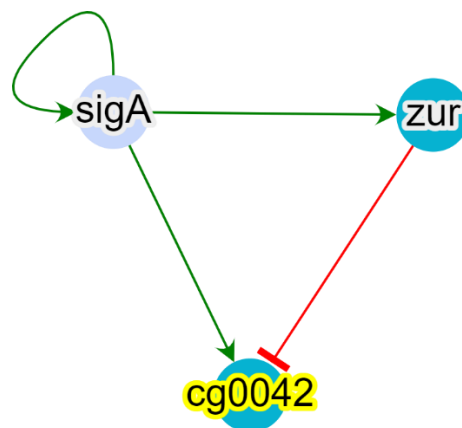

**Supplementary figure 4.** Interaction zur-cg0042 part of the *C. glutamicum* strong network also recovered from *S. coelicolor*.

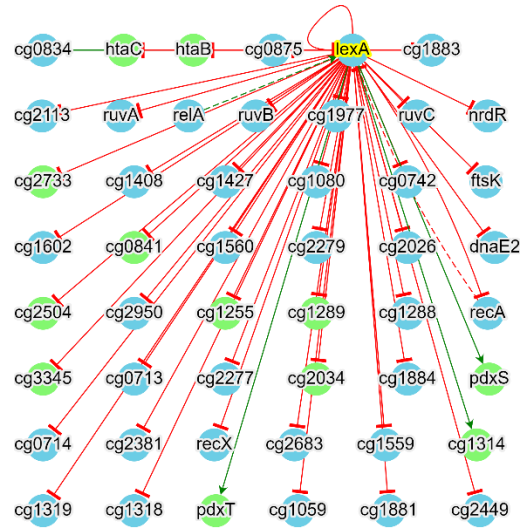

**Supplementary figure 5.** LexA auto-regulation part of the *C. glutamicum* network strongly supported and recovered from *B. subtilis*.

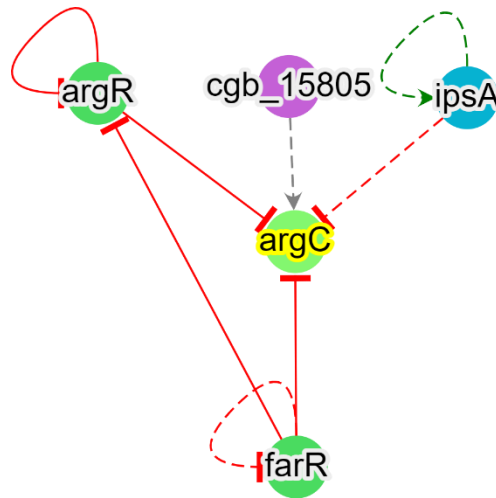

**Supplementary figure 6.** Interaction *argR-argC* part of the *C. glutamicum* strongly supported and recovered from *E. coli*.

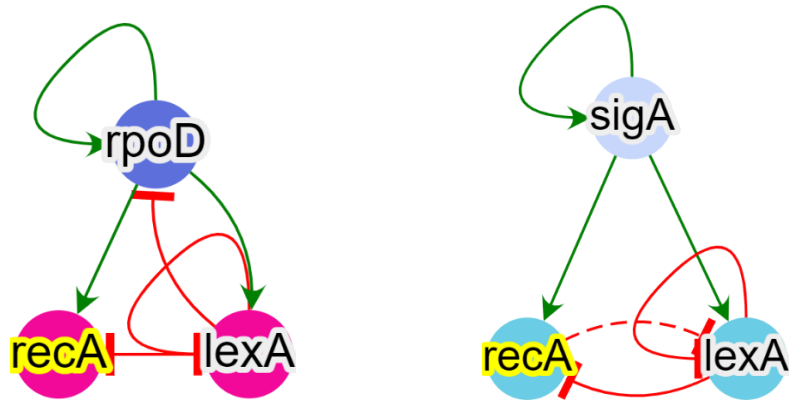

**Supplementary figure 7.** The interaction *lexA-recA* was recovered from *E. coli* (left) and is already part of the *C. glutamicum* network (right) strongly supported.

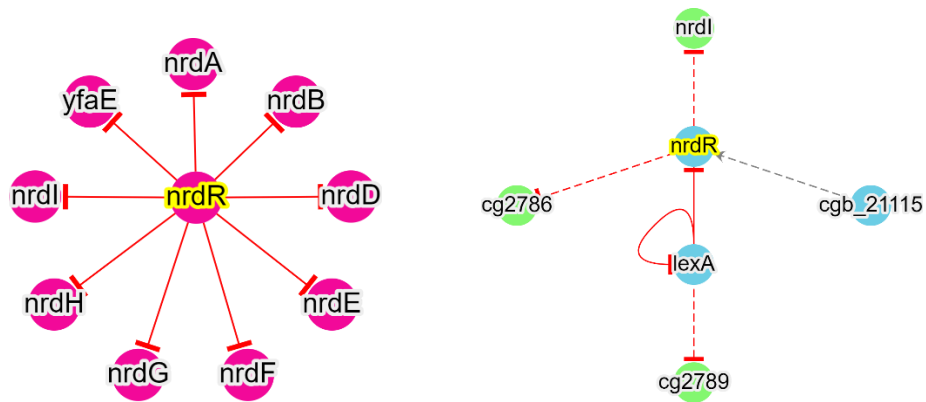

**Supplementary figure 8.** The interaction *nrdR-nrdI* was recovered from *E. coli* (left) and is already part of the *C. glutamicum* network (right) with non-strong evidence supporting it.

## Supplementary tables

**Supplementary Table 1.** Interactions from other *C. glutamicum* strains or not mapping to a cg number. Please consider this is not an exhaustive list of regulations for other strains.

| TF            | TG              | Effect |
|---------------|-----------------|--------|
| <i>cg3247</i> | <i>NCgl2845</i> | +      |
| <i>cg3247</i> | <i>NCgl1729</i> | +      |
| <i>cg0702</i> | <i>cg1652</i>   | -      |
| <i>cg0702</i> | <i>cg1583</i>   | -      |
| <i>cg0702</i> | <i>cg3378</i>   | -      |
| <i>cg0702</i> | <i>cg0400</i>   | +      |
| <i>cg0702</i> | <i>NCgl0166</i> | +      |
| <i>cg0702</i> | <i>cg1582</i>   | -      |
| <i>cg0702</i> | <i>cg3387</i>   | +      |
| <i>cg0702</i> | <i>NCgl0484</i> | +      |
| <i>cg0702</i> | <i>cg0771</i>   | +      |
| <i>cg0702</i> | <i>cg3327</i>   | -      |
| <i>cg3224</i> | <i>NCgl1861</i> | -      |
| <i>cg0702</i> | <i>cg0344</i>   | +      |
| <i>cg3247</i> | <i>NCgl2113</i> | +      |
| <i>cg0702</i> | <i>NCgl2942</i> | +      |
| <i>cg0702</i> | <i>NCgl2893</i> | +      |
| <i>cg0702</i> | <i>cg1215</i>   | -      |
| <i>cg0702</i> | <i>cg3375</i>   | +      |
| <i>cg0702</i> | <i>NCgl0746</i> | -      |
| <i>cg0146</i> | <i>NCgl18</i>   | +      |
| <i>cg0702</i> | <i>cg1528</i>   | -      |
| <i>cg0702</i> | <i>NCgl0608</i> | +      |
| <i>cg0702</i> | <i>cg2252</i>   | +      |
| <i>cg3224</i> | <i>NCgl2817</i> | -      |
| <i>cg0702</i> | <i>cg0345</i>   | +      |
| <i>cg0702</i> | <i>cg1581</i>   | -      |
| <i>cg2831</i> | <i>NCgl1806</i> | +      |
| <i>cg3224</i> | <i>NCgl0361</i> | +      |
| <i>cg0702</i> | <i>cg1584</i>   | -      |
| <i>cg3247</i> | <i>NCgl2738</i> | -      |
| <i>cg3247</i> | <i>NCgl2237</i> | -      |
| <i>cg0702</i> | <i>NCgl0580</i> | +      |
| <i>cg3247</i> | <i>NCgl2861</i> | +      |
| <i>cg0702</i> | <i>NCgl2970</i> | +      |
| <i>cg0702</i> | <i>cg0661</i>   | -      |
| <i>cg3247</i> | <i>NCgl1758</i> | +      |

|               |                  |   |
|---------------|------------------|---|
| <i>cg0702</i> | <i>cg0018</i>    | + |
| <i>cg3247</i> | <i>NCgl0404</i>  | + |
| <i>cg0702</i> | <i>cg1214</i>    | - |
| <i>cg3224</i> | <i>NCgl0360</i>  | + |
| <i>cg3247</i> | <i>NCgl2858a</i> | + |
| <i>cg3247</i> | <i>NCgl1780</i>  | + |
| <i>cg0702</i> | <i>cg1120</i>    | + |
| <i>cg0702</i> | <i>cg3145</i>    | + |
| <i>cg0702</i> | <i>cg0197</i>    | + |
| <i>cg0702</i> | <i>cg0318</i>    | + |
| <i>cg2831</i> | <i>NCgl1812</i>  | - |
| <i>cg2831</i> | <i>NCgl1783</i>  | + |
| <i>cg3247</i> | <i>NCgl1750</i>  | + |
| <i>cg0702</i> | <i>NCgl0638</i>  | + |

**Supplementary Table 2.** Interactions recovered from *S. coelicolor*, *B. subtilis*, and *E. coli*. The *Average rank* is the averaged ranking position between the three inferences with the three motif finding tools (smaller is better). The *Status* can take three values: 1) *network* for interactions that have been already experimentally validated and are part of one of the *C. glutamicum* networks; 2) *potential new TG* for the interactions mediated by a TF that is already a TF in one of the networks, but its regulation of the TG expression has not been experimentally validated; and 3) *new TF* for interactions mediated by TFs with uncharacterized regulons, hence those that are not included in the current networks.

| TF                                  | TG            | Average rank | Status           |
|-------------------------------------|---------------|--------------|------------------|
| Recovered from <i>S. coelicolor</i> |               |              |                  |
| <i>cg0484</i>                       | <i>cg2261</i> | 10.0         | new TF           |
| <i>cg1585</i>                       | <i>cg0850</i> | 42.333       | potential new TG |
| <i>cg2502</i>                       | <i>cg0042</i> | 50.0         | network          |
| <i>cg1585</i>                       | <i>cg2305</i> | 51.0         | potential new TG |
| <i>cg3202</i>                       | <i>cg2117</i> | 54.333       | potential new TG |
| <i>cg0484</i>                       | <i>cg2846</i> | 57.333       | new TF           |
| <i>cg2502</i>                       | <i>cg0991</i> | 59.333       | potential new TG |
| <i>cg0484</i>                       | <i>cg1809</i> | 61.333       | new TF           |
| <i>cg3202</i>                       | <i>cg2929</i> | 62.0         | potential new TG |
| <i>cg1585</i>                       | <i>cg0113</i> | 63.0         | potential new TG |
| <i>cg0484</i>                       | <i>cg2260</i> | 65.333       | new TF           |
| <i>cg1486</i>                       | <i>cg1487</i> | 67.0         | network          |
| <i>cg0484</i>                       | <i>cg2485</i> | 67.333       | new TF           |
| <i>cg1585</i>                       | <i>cg1580</i> | 68.0         | network          |
| <i>cg2109</i>                       | <i>cg2109</i> | 69.0         | network          |

|                                   |               |         |                  |
|-----------------------------------|---------------|---------|------------------|
| <i>cg1585</i>                     | <i>cg0303</i> | 71.0    | potential new TG |
| <i>cg1486</i>                     | <i>cg2383</i> | 71.0    | potential new TG |
| <i>cg1585</i>                     | <i>cg1586</i> | 72.0    | potential new TG |
| <i>cg1585</i>                     | <i>cg2261</i> | 73.333  | potential new TG |
| <i>cg1098</i>                     | <i>cg1098</i> | 74.333  | new TF           |
| <i>cg0484</i>                     | <i>cg2513</i> | 76.667  | new TF           |
| <i>cg0313</i>                     | <i>cg0313</i> | 77.0    | network          |
| <i>cg1486</i>                     | <i>cg1486</i> | 83.667  | potential new TG |
| <i>cg3202</i>                     | <i>cg3202</i> | 85.667  | network          |
| Recovered from <i>B. subtilis</i> |               |         |                  |
| <i>cg2114</i>                     | <i>cg2114</i> | 3.333   | network          |
| <i>cg2114</i>                     | <i>cg2141</i> | 11.667  | network          |
| <i>cg2114</i>                     | <i>cg1996</i> | 15.333  | potential new TG |
| <i>cg2624</i>                     | <i>cg2803</i> | 25.0    | potential new TG |
| <i>cg1585</i>                     | <i>cg1580</i> | 27.333  | network          |
| <i>cg2624</i>                     | <i>cg1142</i> | 29.667  | potential new TG |
| <i>cg1585</i>                     | <i>cg1582</i> | 39.333  | network          |
| <i>cg2516</i>                     | <i>cg3100</i> | 39.667  | potential new TG |
| <i>cg3097</i>                     | <i>cg0113</i> | 40.0    | potential new TG |
| <i>cg1817</i>                     | <i>cg1814</i> | 40.667  | potential new TG |
| <i>cg1817</i>                     | <i>cg1815</i> | 42.333  | network          |
| <i>cg2516</i>                     | <i>cg2514</i> | 44.667  | potential new TG |
| <i>cg2114</i>                     | <i>cg1401</i> | 47.333  | potential new TG |
| <i>cg1817</i>                     | <i>cg1817</i> | 48.0    | network          |
| <i>cg2516</i>                     | <i>cg3099</i> | 49.667  | potential new TG |
| <i>cg2114</i>                     | <i>cg1560</i> | 49.667  | network          |
| <i>cg2114</i>                     | <i>cg0976</i> | 50.667  | potential new TG |
| Recovered from <i>E. coli</i>     |               |         |                  |
| <i>cg1585</i>                     | <i>cg1580</i> | 19.0    | network          |
| <i>cg2114</i>                     | <i>cg2114</i> | 62.667  | network          |
| <i>cg2114</i>                     | <i>cg2141</i> | 64.0    | network          |
| <i>cg0350</i>                     | <i>cg2166</i> | 115.333 | potential new TG |
| <i>cg0350</i>                     | <i>cg3395</i> | 164.333 | potential new TG |
| <i>cg2899</i>                     | <i>cg2637</i> | 169.0   | new TF           |
| <i>cg3224</i>                     | <i>cg2559</i> | 190.667 | potential new TG |
| <i>cg0350</i>                     | <i>cg1568</i> | 195.0   | network          |
| <i>cg1585</i>                     | <i>cg3004</i> | 201.0   | potential new TG |
| <i>cg0350</i>                     | <i>cg2429</i> | 209.667 | network          |
| <i>cg0350</i>                     | <i>cg1257</i> | 211.333 | potential new TG |
| <i>cg0350</i>                     | <i>cg0229</i> | 212.0   | network          |
| <i>cg0001</i>                     | <i>cg0001</i> | 215.667 | new TF           |
| <i>cg1327</i>                     | <i>cg1327</i> | 217.0   | new TF           |



|               |               |         |                  |
|---------------|---------------|---------|------------------|
| <i>cg2502</i> | <i>cg0591</i> | 224.0   | potential new TG |
| <i>cg0350</i> | <i>cg2175</i> | 229.667 | potential new TG |
| <i>cg0350</i> | <i>cg2126</i> | 232.0   | potential new TG |
| <i>cg1585</i> | <i>cg2167</i> | 235.0   | potential new TG |
| <i>cg0350</i> | <i>cg3068</i> | 243.667 | potential new TG |
| <i>cg0350</i> | <i>cg2870</i> | 243.667 | potential new TG |
| <i>cg0350</i> | <i>cg1145</i> | 244.0   | network          |
| <i>cg1327</i> | <i>cg3141</i> | 250.667 | new TF           |
| <i>cg2502</i> | <i>cg2782</i> | 253.667 | potential new TG |
| <i>cg2936</i> | <i>cg2933</i> | 254.333 | network          |
| <i>cg2502</i> | <i>cg3237</i> | 255.0   | potential new TG |
| <i>cg0350</i> | <i>cg3308</i> | 256.0   | potential new TG |
| <i>cg0350</i> | <i>cg2102</i> | 263.0   | potential new TG |
| <i>cg0350</i> | <i>cg1492</i> | 266.667 | potential new TG |
| <i>cg0001</i> | <i>cg1525</i> | 273.667 | new TF           |
| <i>cg2112</i> | <i>cg2787</i> | 281.667 | network          |
| <i>cg1425</i> | <i>cg0001</i> | 283.333 | potential new TG |
| <i>cg2502</i> | <i>cg2183</i> | 285.0   | potential new TG |
| <i>cg0350</i> | <i>cg2841</i> | 286.0   | potential new TG |
| <i>cg1585</i> | <i>cg2166</i> | 287.333 | potential new TG |
| <i>cg0350</i> | <i>cg1790</i> | 290.333 | network          |
| <i>cg0350</i> | <i>cg3340</i> | 290.667 | potential new TG |
| <i>cg2502</i> | <i>cg2502</i> | 291.0   | potential new TG |
| <i>cg0350</i> | <i>cg3423</i> | 291.0   | potential new TG |
| <i>cg0350</i> | <i>cg1586</i> | 293.0   | potential new TG |
| <i>cg1327</i> | <i>cg1656</i> | 293.667 | new TF           |
| <i>cg1585</i> | <i>cg2178</i> | 298.0   | potential new TG |
| <i>cg1585</i> | <i>cg0229</i> | 299.0   | network          |
| <i>cg0350</i> | <i>cg0350</i> | 299.0   | network          |
| <i>cg0350</i> | <i>cg0067</i> | 300.667 | potential new TG |
| <i>cg2114</i> | <i>cg2489</i> | 303.0   | potential new TG |
| <i>cg0350</i> | <i>cg0953</i> | 304.333 | potential new TG |
| <i>cg1425</i> | <i>cg0004</i> | 309.0   | potential new TG |
| <i>cg1585</i> | <i>cg1588</i> | 310.0   | potential new TG |
| <i>cg2112</i> | <i>cg2781</i> | 313.0   | potential new TG |
| <i>cg1585</i> | <i>cg1586</i> | 314.333 | potential new TG |
| <i>cg1585</i> | <i>cg1814</i> | 317.333 | network          |
| <i>cg1327</i> | <i>cg1355</i> | 320.0   | new TF           |
| <i>cg2112</i> | <i>cg2789</i> | 327.667 | network          |
| <i>cg0001</i> | <i>cg0004</i> | 328.0   | new TF           |
| <i>cg1327</i> | <i>cg2856</i> | 329.0   | new TF           |
| <i>cg1425</i> | <i>cg0306</i> | 331.0   | potential new TG |

|               |               |         |                  |
|---------------|---------------|---------|------------------|
| <i>cg2899</i> | <i>cg2899</i> | 331.667 | new TF           |
| <i>cg0350</i> | <i>cg0699</i> | 333.667 | potential new TG |
| <i>cg1425</i> | <i>cg0005</i> | 334.667 | potential new TG |
| <i>cg0350</i> | <i>cg0673</i> | 340.667 | potential new TG |
| <i>cg0350</i> | <i>cg3336</i> | 345.333 | potential new TG |
| <i>cg0350</i> | <i>cg1163</i> | 351.667 | potential new TG |
| <i>cg1327</i> | <i>cg1383</i> | 362.333 | new TF           |
| <i>cg0350</i> | <i>cg2932</i> | 362.667 | potential new TG |
| <i>cg0001</i> | <i>cg1550</i> | 370.333 | new TF           |
| <i>cg0001</i> | <i>cg0005</i> | 374.333 | new TF           |
| <i>cg2114</i> | <i>cg1602</i> | 375.0   | network          |
| <i>cg1327</i> | <i>cg2891</i> | 376.667 | new TF           |
| <i>cg0350</i> | <i>cg2178</i> | 379.0   | potential new TG |
| <i>cg0350</i> | <i>cg3096</i> | 379.667 | network          |
